# Supplementary material
Source: PubMed Central journal article supplement (PMC3745025)
Supplement: NIHMS412967-supplement.pdf [file NIHMS412967-supplement.pdf]

# A Planar Microfluidic Mixer Based on Logarithmic Spirals

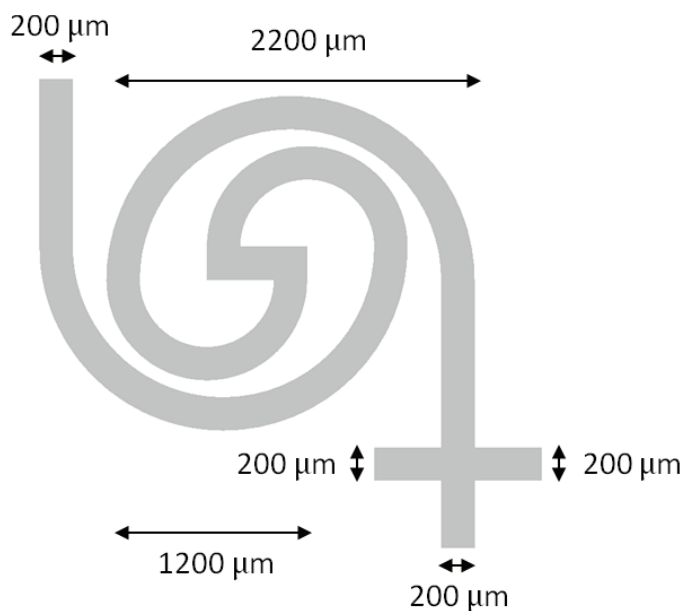

**Figure 1.** This is the scaled Archimedes geometry that was simulated and discussed in Section 4.1. The results of this simulation are shown in figure 4. The geometry consists of three perpendicular  $200\ \mu\text{m}$  wide inlets. Channel depth is kept constant at  $50\ \mu\text{m}$ , as is channel width ( $200\ \mu\text{m}$ ), throughout the geometry. This Archimedes Spiral consists of two pieces with the outer curve diameter specified as  $2200\ \mu\text{m}$  and two pieces with the outer curve diameter specified as  $1200\ \mu\text{m}$ . There is a straight channel that allows the radius of curvature to change directions from counter-clockwise to clockwise. This Archimedes spiral mixer has approximately the same pathlength as the SeLMA micromixer.

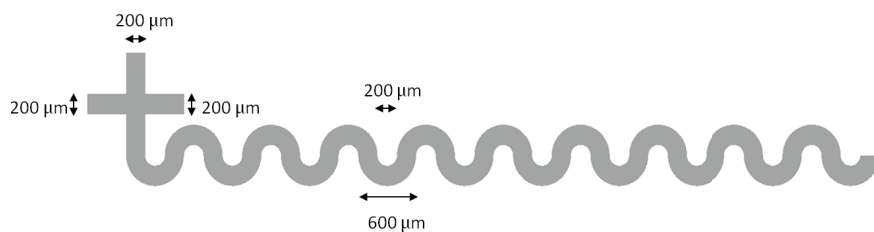

**Figure 2.** This is the scaled Meandering-S geometry that was simulated and discussed in Section 4.1. The results of this simulation are shown in figure 4. The geometry consists of three perpendicular  $200\ \mu\text{m}$  wide inlets. Channel depth is kept constant at  $50\ \mu\text{m}$  throughout the geometry. This Meandering-S consists of joined  $200\ \mu\text{m}$  wide semi-circles. The outer and inner arcs of each semi-circle have diameters of  $600$  and  $200$ ,  $\mu\text{m}$ , respectively. This Meandering-S mixer has approximately the same pathlength as the SeLMA micromixer.

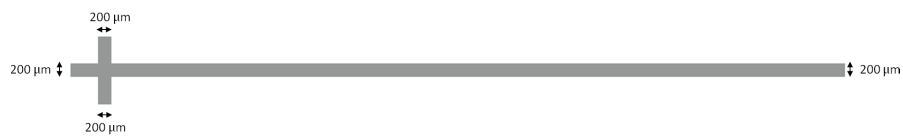

**Figure 3.** This is the scaled T-Channel geometry that was simulated and discussed in Section 4.1. The results of this simulation are shown in figure 4. The geometry consists of three perpendicular  $200 \mu\text{m}$  wide inlets. Channel depth is kept constant at  $50 \mu\text{m}$ , as is channel width ( $200 \mu\text{m}$ ), throughout the geometry. This T-Channel mixer has approximately the same pathlength as the SeLMA micromixer.
